# Supplementary material
Source: PubMed Central journal article supplement (PMC2246414)

## SUPPLEMENTAL INFORMATION

### METHODS

#### **Whole genome expression analysis.**

Homozygous *Gcn5*<sup>E333st</sup> and *Ada2a*<sup>A189</sup> animals follow a slowed-down course of development (Carre et al., 2005; Pankotai et al., 2005). They show an extended third larval instar, then incompletely evert spiracles and form abnormal puparium which fails to shorten. RNA samples were isolated in triplicate from homozygous and heterozygous *Gcn5*<sup>E333st</sup> and *Ada2a*<sup>A189</sup> at the end of the third larval instar, as defined by spiracle eversion, and were labeled and hybridized to Affymetrix *Drosophila* genome arrays. A detailed analysis of these experiments will be published elsewhere (T. Pankotai, et al., manuscript in preparation). Extraction, normalization and computation of the expression indexes were performed using the RMA function of Bioconductor's affy package (Gautier et al., 2004; Gentleman et al., 2004). The statistical significance of transcriptional variations was assessed using SAM software with a fold change (FC) threshold of 3 identical to the threshold used in (Badenhorst et al., 2005) and a false detection rate (FDR) lower than 1% (Tusher et al., 2001).

To compare our data with microarray data from (Badenhorst et al., 2005), we used the correspondence table between probe sets on each array provided by Affymetrix. On this basis, among the probesets downregulated in *Nurf301* mutants, we obtained the number of probesets downregulated in *dGcn5* and *dAda2a* mutants and compared them to the numbers expected from the distribution of the *dGcn5* positive probesets on the complete array. We computed the *p-value* for the null hypothesis of no association between the two distributions, with a binomial distribution.

### **Quantitative RT-PCR.**

Random-primed reverse transcription was performed at 42°C using the IScript cDNA synthesis kit (Bio-Rad) and 1µg of total DNase-treated RNA from third instar larvae (RNeasy mini Kit, Qiagen). Control reactions lacking the RT enzyme were systematically checked for the absence of product. Quantitative real-time PCR measurements were performed in triplicate in an Opticon II thermocycler (Bio-Rad), using the Fast start SYBR Green Master Mix (Roche). Primer sets for genes of interest were as follows: *Hsp70A*: ATGCCAGCGAATAACCTC and CCTGCTTCACATTGAAGACGTA, *Ada2a*: CGTGAACAAAACGCGTCA and AGGACGGTGGTCTGCTGATA, *Ada2b*: GCGAAAACCTTCGATTTGTGTC and CCCCTTCCACGAAATACAC, *Gcn5*: AGTTCATAGCTGTAATTCGCAGTCA and CAAGTCAAGCCGGGTCTTACTT, *Ubx*: ACTGGCTAGGTACAAATGG and GTAGCGGGTGTATGTCTGTC, *engrailed*: TAAGCGGGAGTTCAACGAG and CGTCGACTTCTTGATCTTGG, *Rp49*: CGGATCGATATGCTAAGCTGT and GCGCTTGTTGATCCGTA. *Rp49* transcripts levels were used to normalize between samples using the standard curve method.

### **Immunohistochemistry and western blotting.**

Immunostainings of imaginal discs dissected from third instar larvae were performed as described (Dequier et al., 2001). Mousse anti-engrailed 4D9 from Developmental Studies Hybridoma Bank at the University of Iowa (<http://www.uiowa.edu/~dshbwww/index.html>) was used at 1:500 dilution. Secondary antibody was Cy3-conjugated anti-mouse (1:200) from Jackson Laboratories. Slides were mounted in Vectashield (VECTOR Laboratories) and imaging was carried out using a confocal microscope Zeiss AXIOVERT 200M, Zeiss LSM510 + FCS.

Late larval instar salivary gland extracts were prepared from 20 hand-dissected pairs of salivary glands lysed in 30 µl of cracking buffer (0.125 M Tris ph 6.8, 5% β-mercaptoethanol,

2% SDS, 4M Urea). For western blot analysis, 5  $\mu$ l of extract were separated of 18% acrylamide PAGE and probed as described (Carre et al., 2005) using anti-H4-AcK12 (Upstate) or anti-H4 antibodies (Abcam) at 1:1000 dilution. Secondary HRP-conjugated anti-rabbit antibody (Vector Laboratory) was used at 1:5000 dilution and detected using the SuperSignal® west Pico Chemiluminescent Substrate (PIERCE).

## REFERENCES

- Badenhorst, P., Xiao, H., Cherbas, L., Kwon, S.Y., Voas, M., Rebay, I., Cherbas, P. and Wu, C. (2005) The *Drosophila* nucleosome remodeling factor NURF is required for Ecdysteroid signaling and metamorphosis. *Genes Dev*, **19**, 2540-2545.
- Carre, C., Szymczak, D., Pidoux, J. and Antoniewski, C. (2005) The histone H3 acetylase dGcn5 is a key player in *Drosophila melanogaster* metamorphosis. *Mol Cell Biol*, **25**, 8228-8238.
- Dequier, E., Souid, S., Pal, M., Maroy, P., Lepesant, J.A. and Yanicostas, C. (2001) Top-*DER*- and *Dpp*-dependent requirements for the *Drosophila* *fos/kayak* gene in follicular epithelium morphogenesis. *Mech Dev*, **106**, 47-60.
- Gautier, L., Cope, L., Bolstad, B.M. and Irizarry, R.A. (2004) affy--analysis of Affymetrix GeneChip data at the probe level. *Bioinformatics*, **20**, 307-315.
- Gentleman, R.C., Carey, V.J., Bates, D.M., Bolstad, B., Dettling, M., Dudoit, S., Ellis, B., Gautier, L., Ge, Y., Gentry, J., Hornik, K., Hothorn, T., Huber, W., Iacus, S., Irizarry, R., Leisch, F., Li, C., Maechler, M., Rossini, A.J., Sawitzki, G., Smith, C., Smyth, G., Tierney, L., Yang, J.Y. and Zhang, J. (2004) Bioconductor: open software development for computational biology and bioinformatics. *Genome Biol*, **5**, R80.
- Pankotai, T., Komonyi, O., Bodai, L., Ujfaludi, Z., Muratoglu, S., Ciurciu, A., Tora, L., Szabad, J. and Boros, I. (2005) The homologous *Drosophila* transcriptional adaptors ADA2a and ADA2b are both required for normal development but have different functions. *Mol Cell Biol*, **25**, 8215-8227.
- Tusher, V.G., Tibshirani, R. and Chu, G. (2001) Significance analysis of microarrays applied to the ionizing radiation response. *Proc Natl Acad Sci U S A*, **98**, 5116-5121.

## LEGENDS TO SUPPLEMENTARY FIGURES

**Supplementary Figure S1. Gcn5 regulates the expression of *engrailed*, *Ultrabithorax* and *hsp70* genes.**

(A) Confocal analysis of Engrailed protein expression in wing imaginal discs from wild type and *Gcn5<sup>E333st</sup>/Gcn5<sup>E333st</sup>* late third instar larvae. (B) Quantitative RT-PCR analysis of *Ubx* and *engrailed* transcript abundance in total RNA from *Gcn5<sup>E333st</sup>* homozygous late third instar mutant larvae. Transcript levels were normalized to rp49 and are expressed as fold-changes relative to levels in heterozygous control animals. Bars represent the standard deviation of three independent determinations. (C) Quantitative RT-PCR analysis of *hsp70Ab* induction in *Gcn5<sup>f02830</sup>* and *Gcn5<sup>E333st</sup>* late third instar larvae. Bars represent the standard deviation of three independent determinations.

**Supplementary Figure S2. (A) *Gcn5* and *Ada2a* mutation do not impair *Iswi* binding to chromosomes.** Polytene chromosomes from wild type (wt), *Gcn5<sup>E333st</sup>*, *Ada2a<sup>A189</sup>* and *Iswi<sup>2</sup>* homozygous mutant were co-stained with anti-*Iswi* and anti-PolIII antibody. (B) ***Iswi* mutation impairs *Ada2a* binding to chromosomes.** Polytene chromosomes from wild type (wt) and *Iswi<sup>2</sup>* (*Iswi*) homozygous mutant were co-stained with anti *Ada2a* (red) and anti-PolIII (green) antibodies and DAPI (blue) as indicated.

**Supplementary Figure S3. *Iswi* mutation does not affect *Gcn5*, *Ada2a* and *Ada2b* expression levels.**

Quantitative RT-PCR analysis of *Gcn5*, *Ada2a* and *Ada2b* transcript abundance in total RNA from *Iswi<sup>2</sup>* late third instar mutant larvae. Transcript levels were normalized to rp49 and

are expressed as fold-changes relative to levels in wild type control animals. Bars represent the standard deviation of three independent determinations.

**Supplementary Figure S4. Chromosome H4-AcK12 acetylation is impaired by mutations in components of the Iswi-containing NURF remodeling complex.**

(A) Polytene chromosomes from wild type (wt) and *Iswi*<sup>2</sup> homozygous mutant were co-stained with anti H4-AcK12 (red) and anti-PolIII (green) antibodies as indicated. (B) Magnification of the tip of male X polytene chromosomes from wild type, homozygous *Iswi*<sup>2</sup> and *Nurf301*<sup>1/3</sup> mutants co-stained with DAPI (blue) and H4-AcK12 (red) antibodies.

**Supplementary Figure S5. *Iswi* and *Nurf301* mutations reduce global H4-AcK12 level in salivary glands.**

Western blots of salivary gland protein extracts from wild type, *Gcn5*<sup>E333st</sup>, *Iswi*<sup>2</sup>, *Nurf301*<sup>3</sup>, *Ada2b*<sup>A842</sup> and *Ada2a*<sup>A189</sup> late third instar larvae were probed with antibodies against H4-AcK12 and H4 histone (loading control) as indicated.

# Carré\_Sup\_Fig. S1

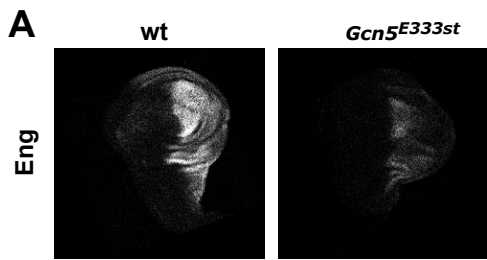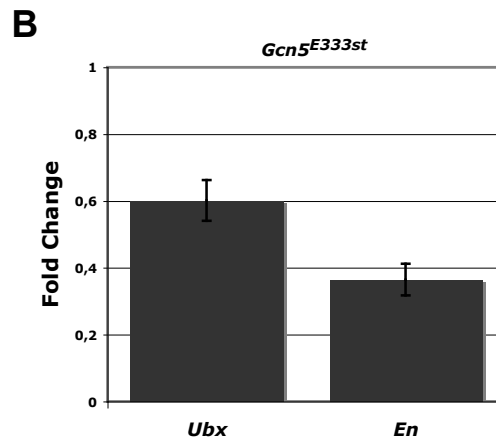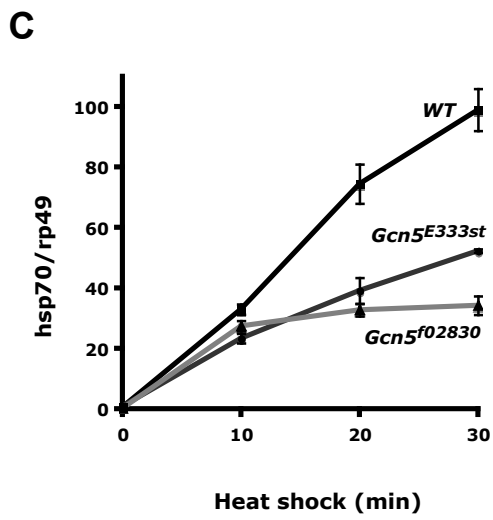

A

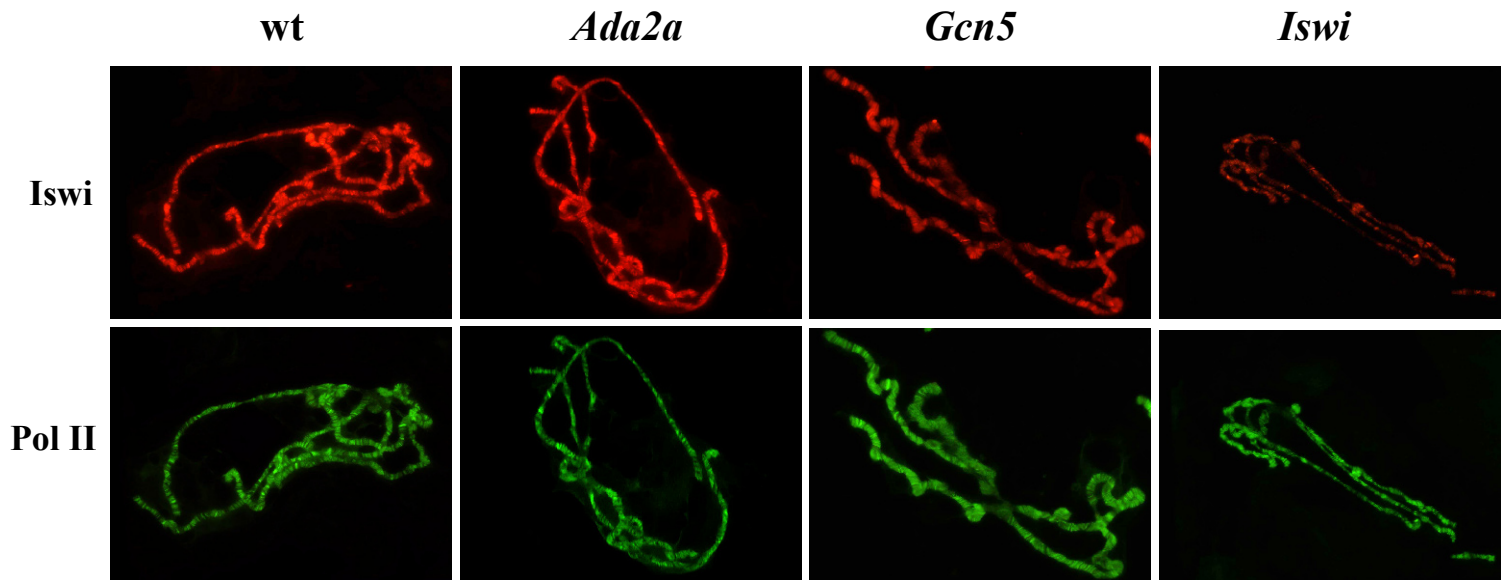

B

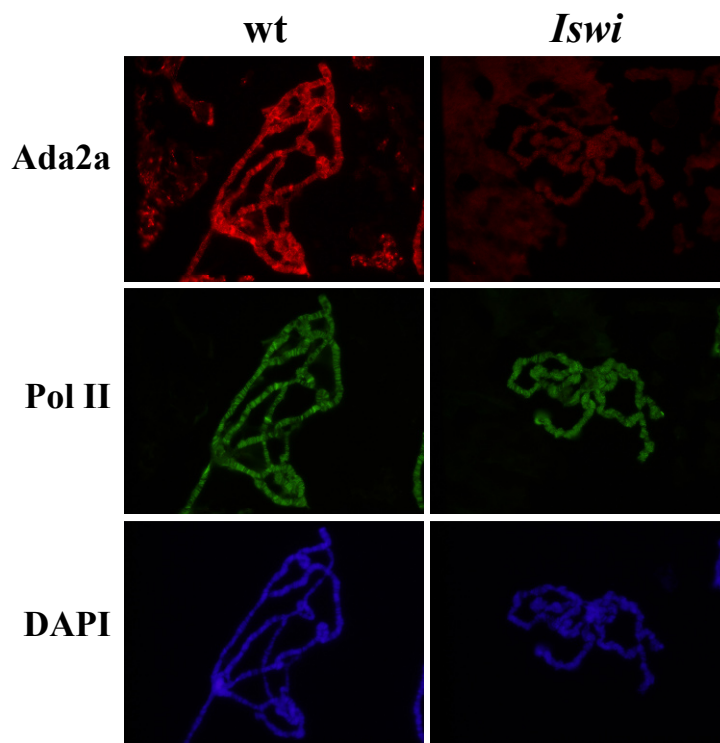



Carré\_Sup\_Fig. S3

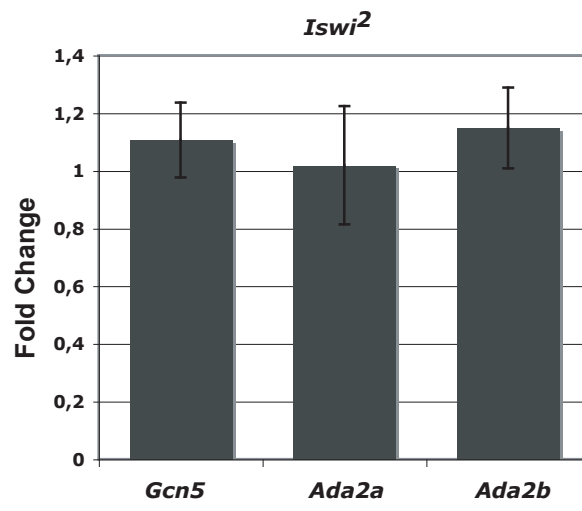

Carré\_Sup\_Fig. S4

A

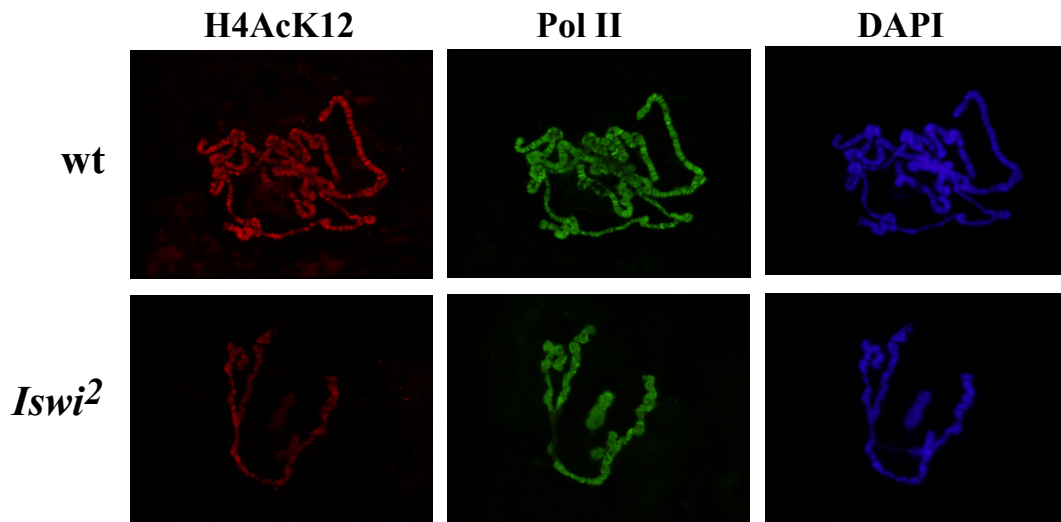

B

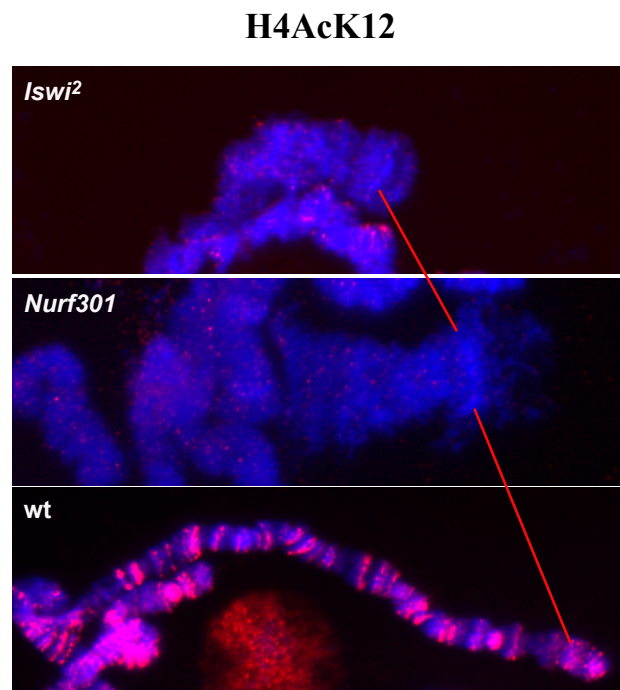

Supplement: 7401141-s3.pdf [file 7401141-s3.pdf]
